# Supplementary material for: Bimetallic PdII complexes with NHC/Py/PCy3 donor set ligands: applications in α-arylation, Suzuki–Miyaura and Sonogashira coupling reactions
Source: Royal Society of Chemistry journal article supplement (doi:10.1039/d2nj01852g), 2022-01-01
Supplement: d2nj01852g1.pdf [file d2nj01852g1.pdf]

# Bimetallic Pd<sup>II</sup> Complexes with NHC/Py/PCy<sub>3</sub> Donor Set Ligands: Applications in $\alpha$ -Arylation, Suzuki-Miyaura and Sonogashira Coupling Reactions

*Adhir Majumder,<sup>[a]</sup> Rajat Naskar,<sup>[a]</sup> Shankab J. Phukan<sup>[b]</sup> and Ramananda Maity<sup>\*[a]</sup>*

*[a] Department of Chemistry, University of Calcutta, Kolkata, West Bengal, 700009, India.*

*[b] Department of Chemistry, Institute of Science, Banaras Hindu University, Varanasi 221 005, Uttar Pradesh, India.*

## Supporting Information

### Index

- Figure S1. <sup>1</sup>H NMR spectrum of [2] in CDCl<sub>3</sub>.
- Figure S2. <sup>13</sup>C{<sup>1</sup>H} NMR spectrum of [2] in CDCl<sub>3</sub>.
- Figure S3. HMQC NMR spectrum of [2] in CDCl<sub>3</sub>.
- Figure S4. HMBC NMR spectrum of [2] in CDCl<sub>3</sub>.
- Figure S5. <sup>1</sup>H NMR spectrum of [3] in CDCl<sub>3</sub>.
- Figure S6. <sup>13</sup>C{<sup>1</sup>H} NMR spectrum of [3] in CDCl<sub>3</sub>.
- Figure S7. HMQC NMR spectrum of [3] in CDCl<sub>3</sub>.
- Figure S8. HMBC NMR spectrum of [3] in CDCl<sub>3</sub>.
- Figure S9. <sup>1</sup>H NMR spectrum of [4] in CDCl<sub>3</sub>.
- Figure S10. <sup>13</sup>C{<sup>1</sup>H} NMR spectrum of [4] in CDCl<sub>3</sub>.
- Figure S11. HMQC NMR spectrum of [4] in CDCl<sub>3</sub>.
- Figure S12. HMBC NMR spectrum of [4] in CDCl<sub>3</sub>.
- Figure S13. <sup>1</sup>H NMR spectrum of [5] in CDCl<sub>3</sub>.
- Figure S14. <sup>13</sup>C{<sup>1</sup>H} NMR spectrum of [5] in CDCl<sub>3</sub>.
- Figure S15. <sup>31</sup>P{<sup>1</sup>H} NMR spectrum of [5] in CDCl<sub>3</sub>.
- Figure S16. <sup>1</sup>H NMR spectrum of 1-methyl-3-(o-tolyl)indolin-2-one in CDCl<sub>3</sub>.
- Figure S17. <sup>13</sup>C{<sup>1</sup>H} NMR spectrum of 1-methyl-3-(o-tolyl)indolin-2-one in CDCl<sub>3</sub>.
- Figure S18. <sup>1</sup>H NMR spectrum of 3-mesityl-1-methylindolin-2-one in CDCl<sub>3</sub>.
- Figure S19. <sup>13</sup>C{<sup>1</sup>H} NMR spectrum of 3-mesityl-1-methylindolin-2-one in CDCl<sub>3</sub>.
- Figure S20. <sup>1</sup>H NMR spectrum of 1-methyl-3-(2,4,6-triisopropylphenyl)indolin-2-one in CDCl<sub>3</sub>.

Figure S21.  $^{13}\text{C}\{^1\text{H}\}$  NMR spectrum of 1-methyl-3-(2,4,6-triisopropylphenyl)indolin-2-one in  $\text{CDCl}_3$ .

Figure S22.  $^1\text{H}$  NMR spectrum of 1-methyl-3-(2,3,5,6-tetramethylphenyl)indolin-2-one in  $\text{CDCl}_3$ .

Figure S23.  $^{13}\text{C}\{^1\text{H}\}$  NMR spectrum of 1-methyl-3-(2,3,5,6-tetramethylphenyl)indolin-2-one in  $\text{CDCl}_3$ .

Figure S24.  $^1\text{H}$  NMR spectrum of 1-methyl-3-(naphthalen-1-yl)indolin-2-one in  $\text{CDCl}_3$ .

Figure S25.  $^{13}\text{C}\{^1\text{H}\}$  NMR spectrum of 1-methyl-3-(naphthalen-1-yl)indolin-2-one in  $\text{CDCl}_3$ .

Figure S26.  $^1\text{H}$  NMR spectrum of 1-methyl-3-(2-methylnaphthalen-1-yl)indolin-2-one in  $\text{CDCl}_3$ .

Figure S27.  $^{13}\text{C}\{^1\text{H}\}$  NMR spectrum of 1-methyl-3-(2-methylnaphthalen-1-yl)indolin-2-one in  $\text{CDCl}_3$ .

Figure S28. Cyclic voltammograms of the complexes [4] and [5] in  $\text{DMF}-0.1\text{ M Bu}_4\text{NCIO}_4$  at 298 K. Scan rate:  $100\text{ mV s}^{-1}$ .

Table S1. Electrochemical data from cyclic voltammetry

Table S2. Solvent screening for catalytic copper-free Sonogashira coupling reaction.

Table S3. Crystallographic details.

Table S4. Selected bond lengths in  $\text{\AA}$ .

Table S5. Selected bond angles in  $^\circ$

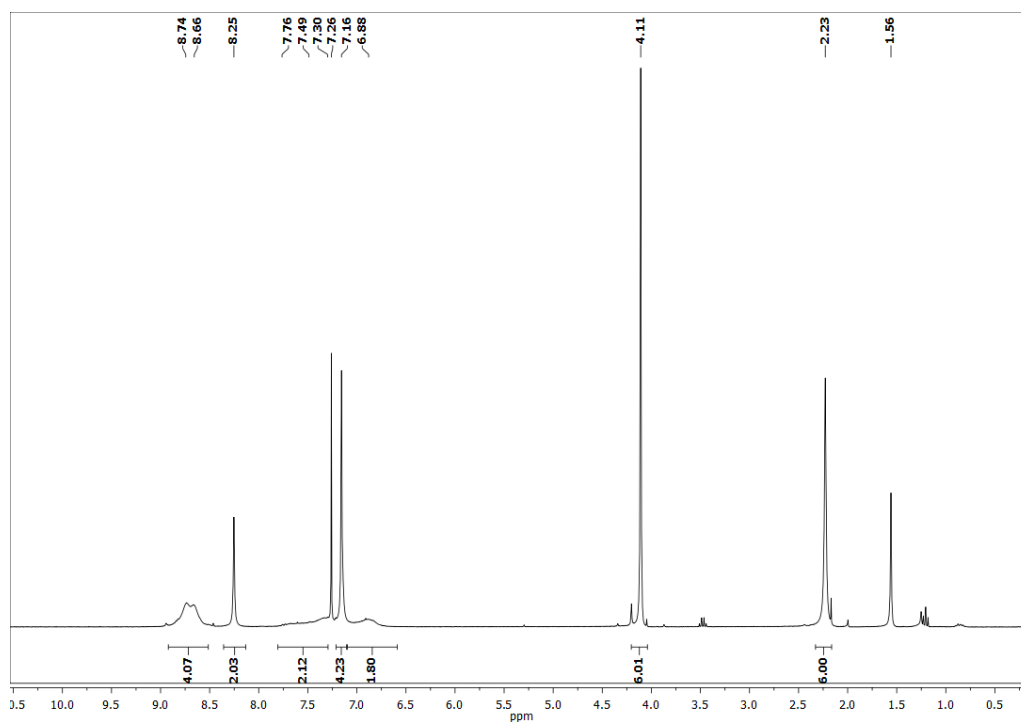

Figure S1.  $^1\text{H}$  NMR spectrum of [2] in  $\text{CDCl}_3$ .

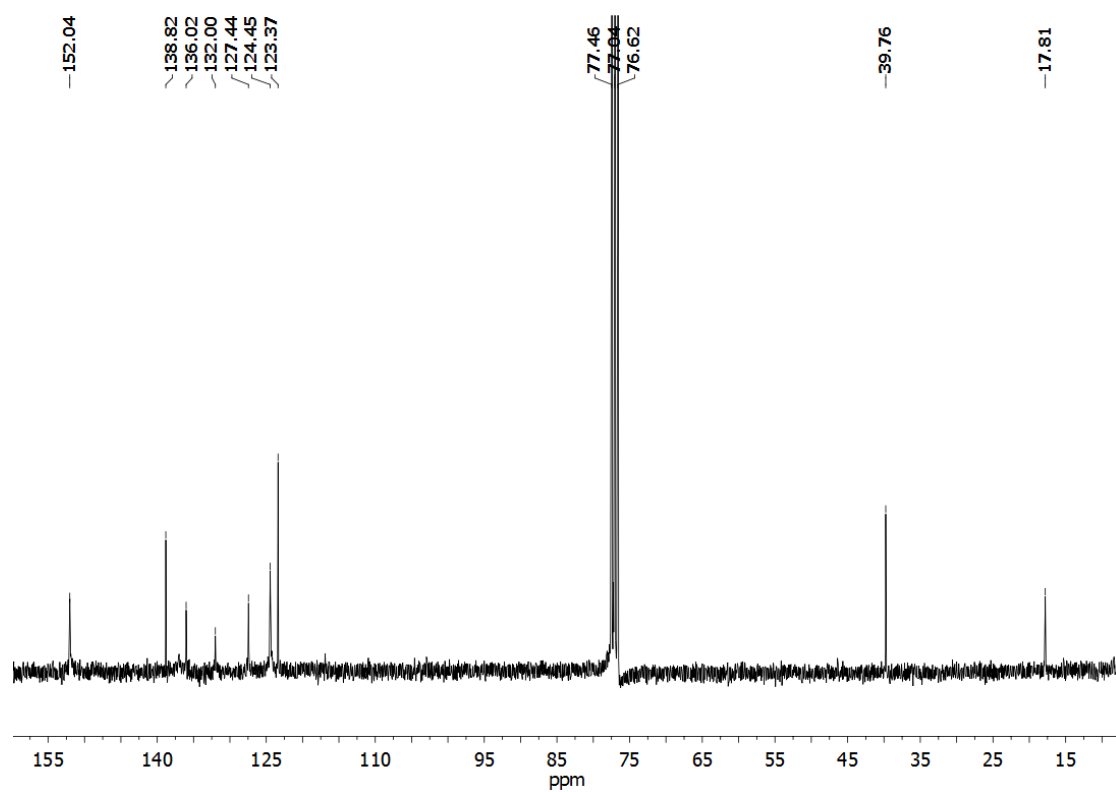

**Figure S2.**  $^{13}\text{C}\{^1\text{H}\}$  NMR spectrum of [2] in  $\text{CDCl}_3$ .

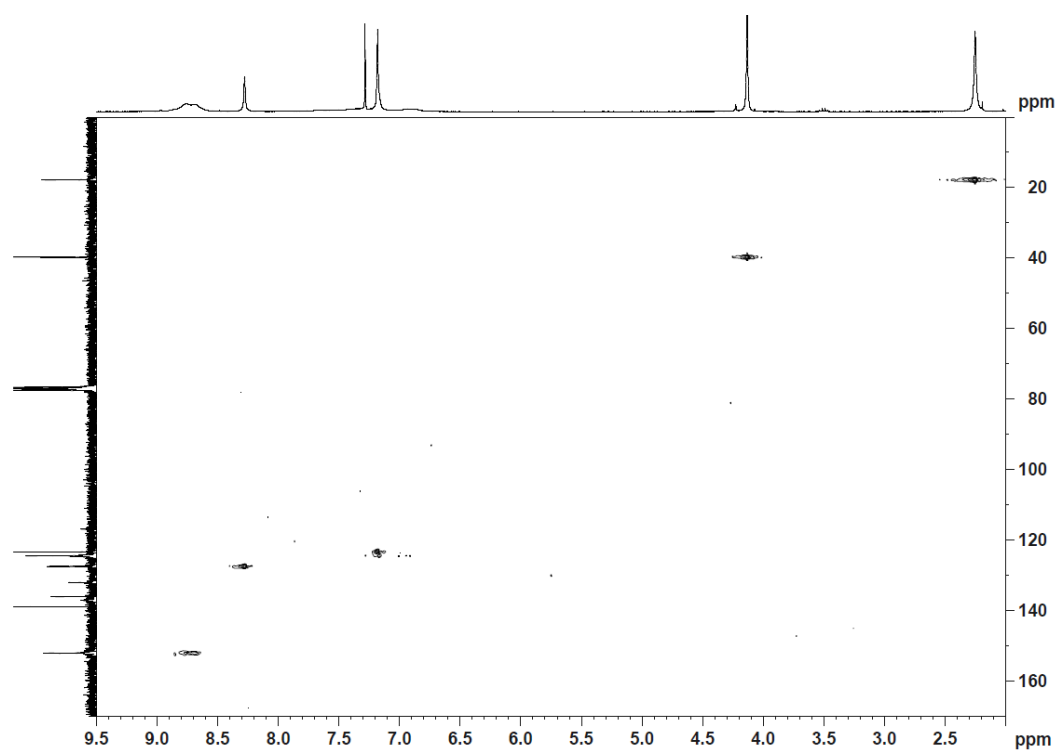

**Figure S3.** HSQC NMR spectrum of [2] in  $\text{CDCl}_3$ .

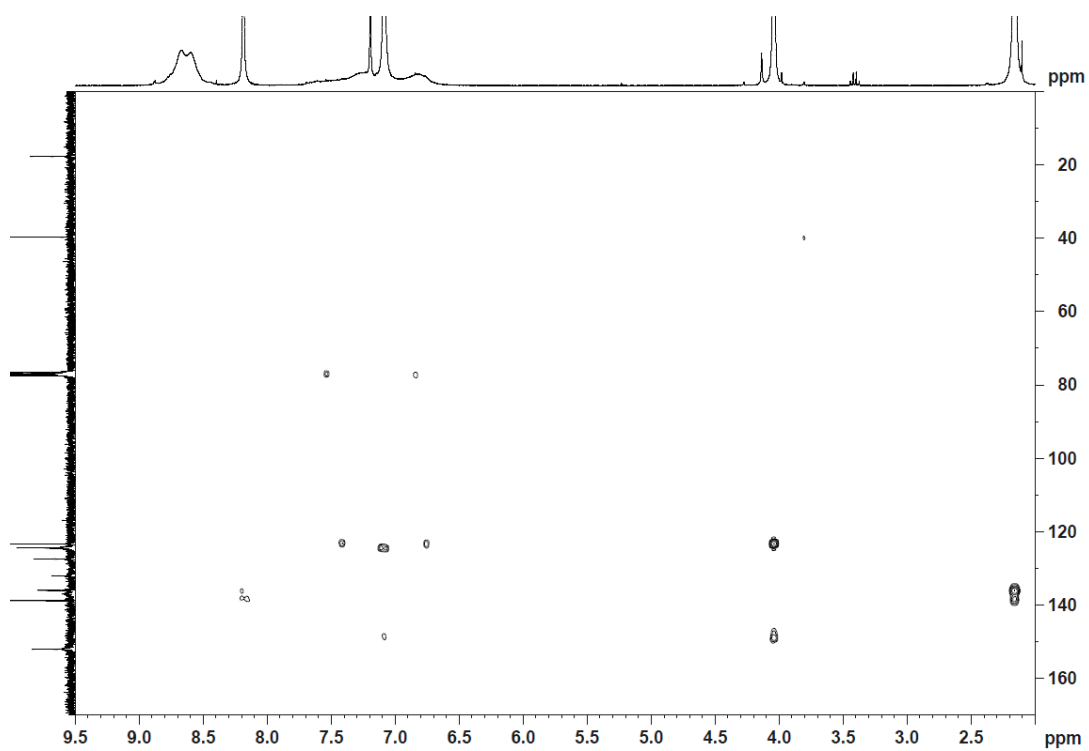

**Figure S4.** HMBC NMR spectrum of [2] in  $\text{CDCl}_3$ .

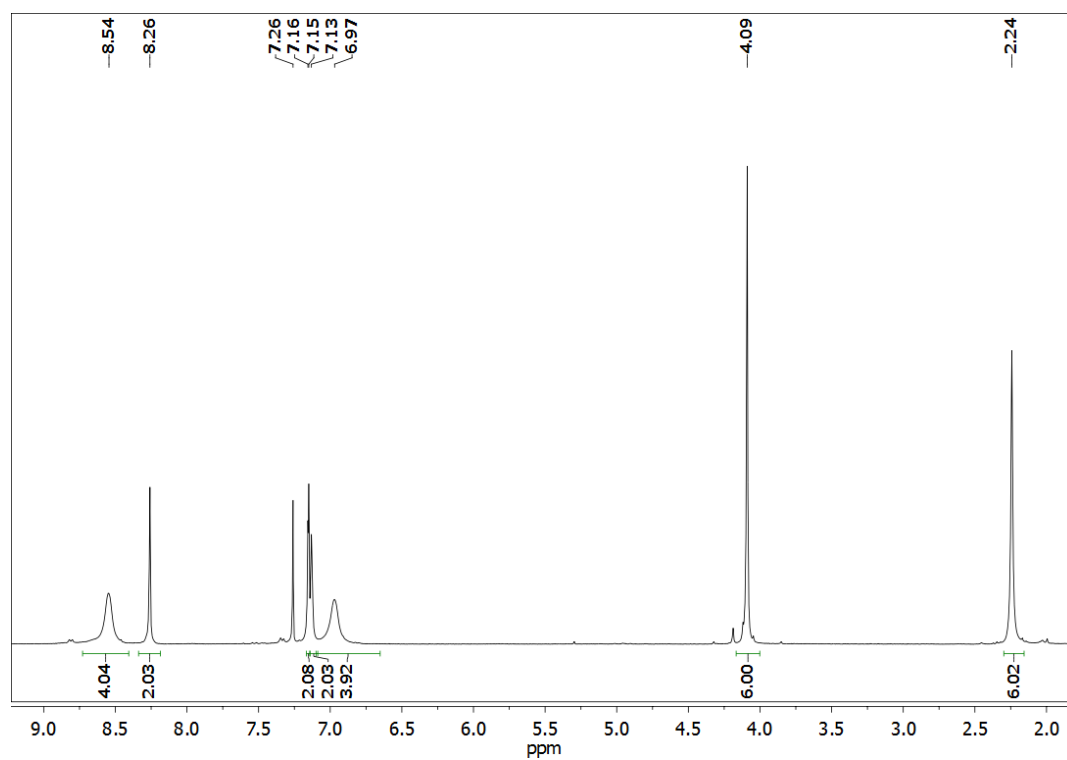

**Figure S5.**  $^1\text{H}$  NMR spectrum of [3] in  $\text{CDCl}_3$ .

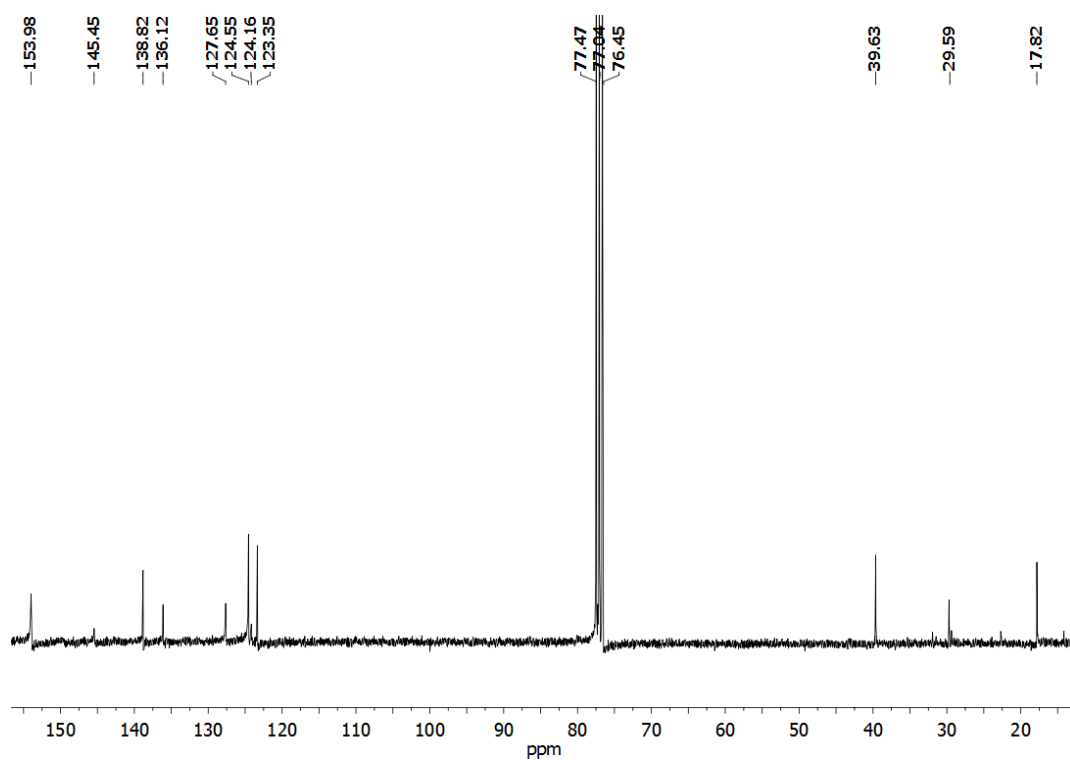

**Figure S6.**  $^{13}\text{C}\{^1\text{H}\}$  NMR spectrum of [3] in  $\text{CDCl}_3$ .

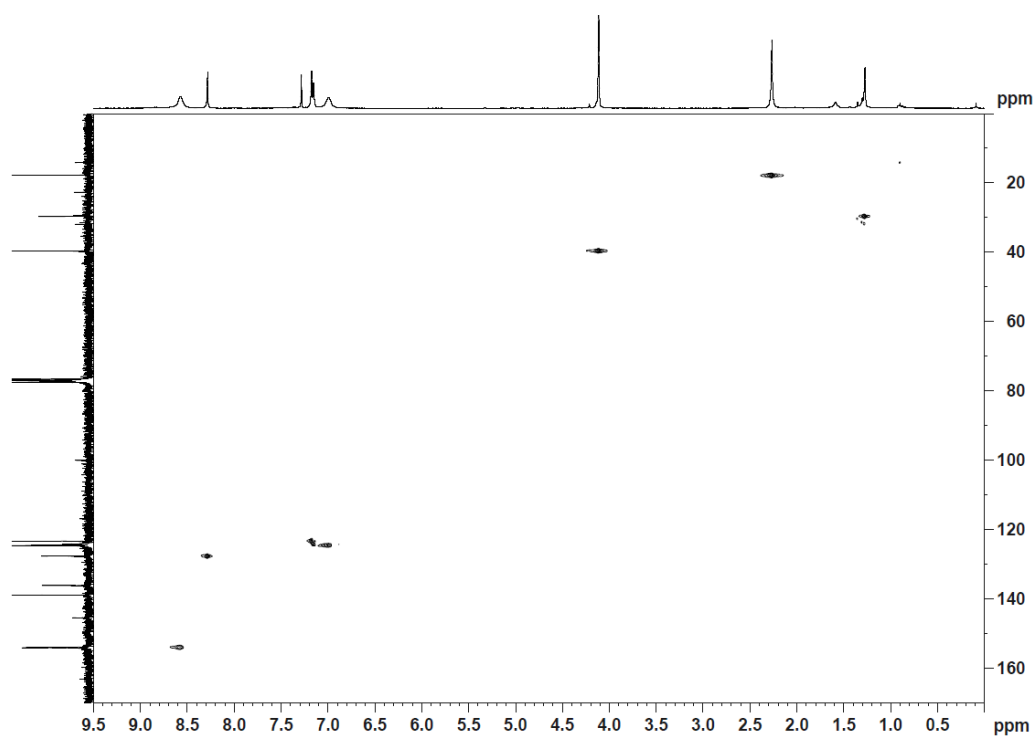

**Figure S7.** HSQC NMR spectrum of [3] in  $\text{CDCl}_3$ .

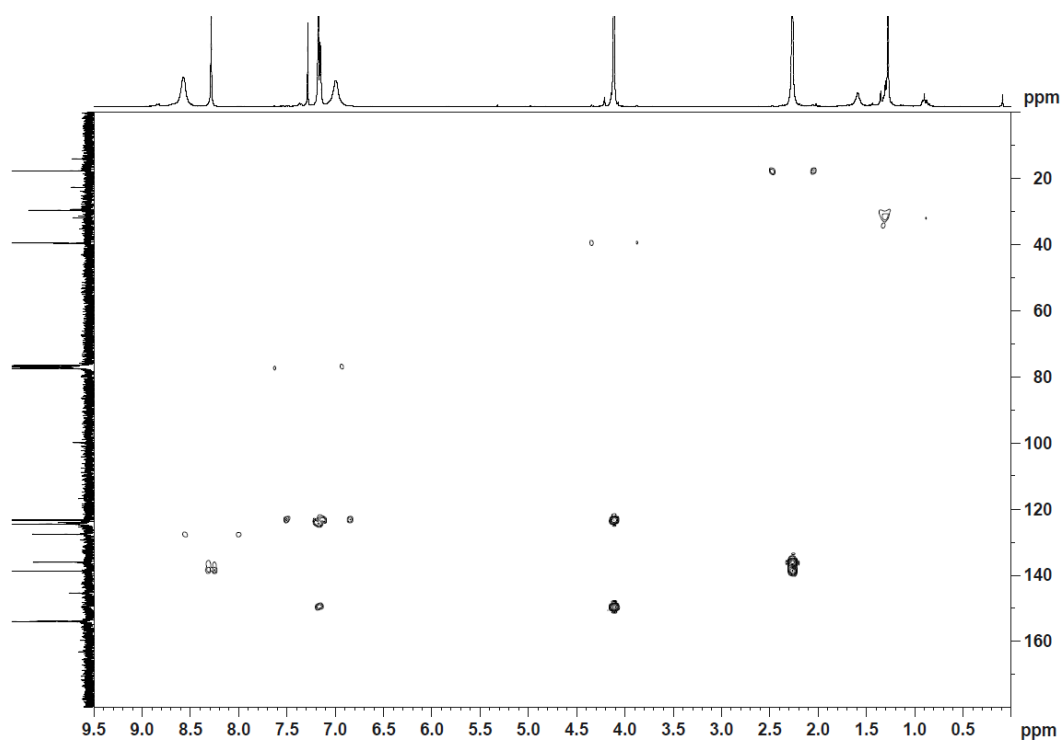

**Figure S8.** HMBC NMR spectrum of [3] in CDCl<sub>3</sub>.

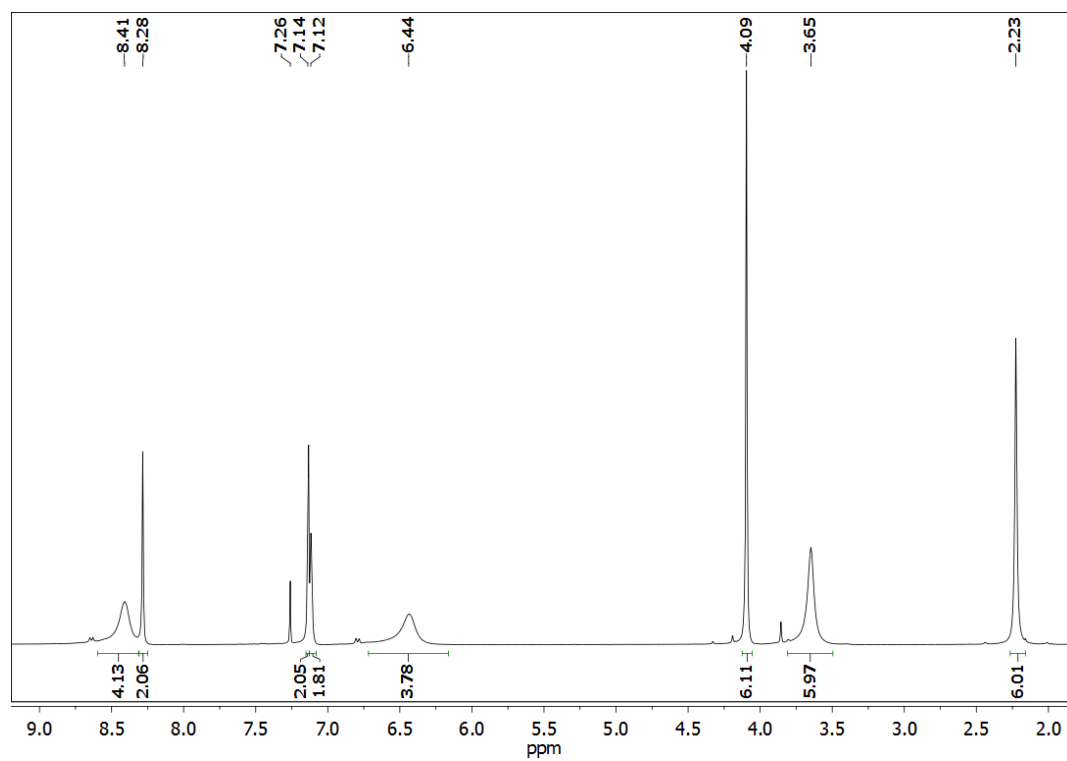

**Figure S9.** <sup>1</sup>H NMR spectrum of [4] in CDCl<sub>3</sub>.

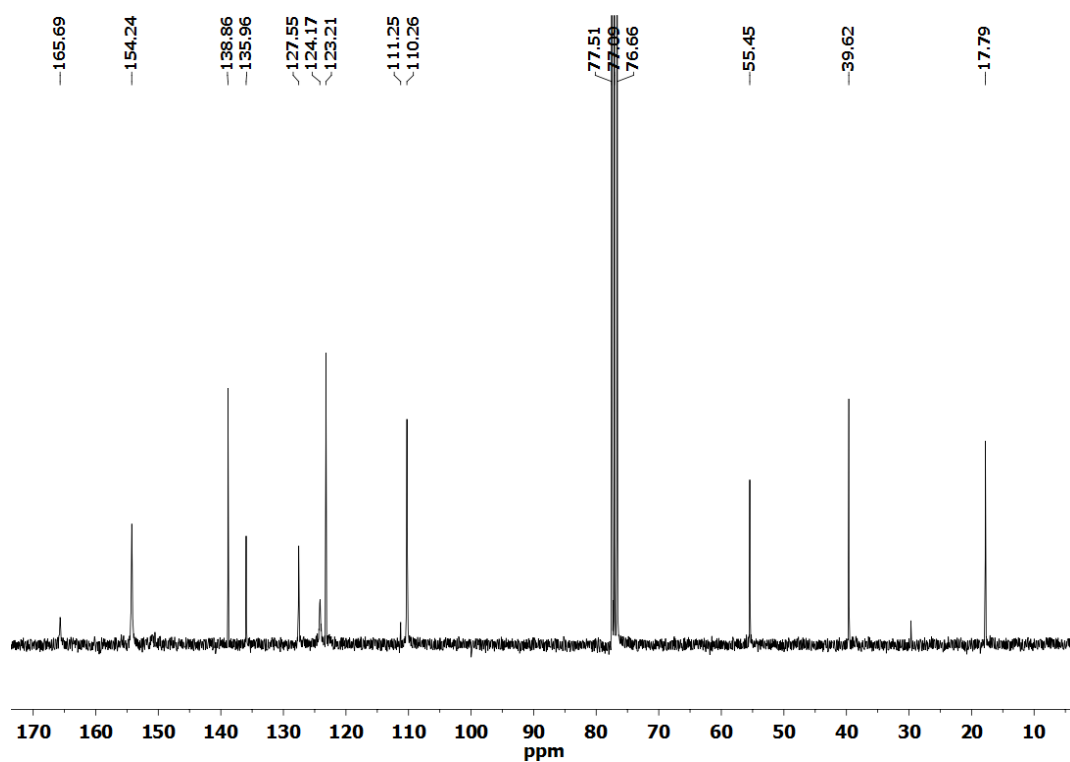

**Figure S10.**  $^{13}\text{C}\{^1\text{H}\}$  NMR spectrum of [4] in  $\text{CDCl}_3$ .

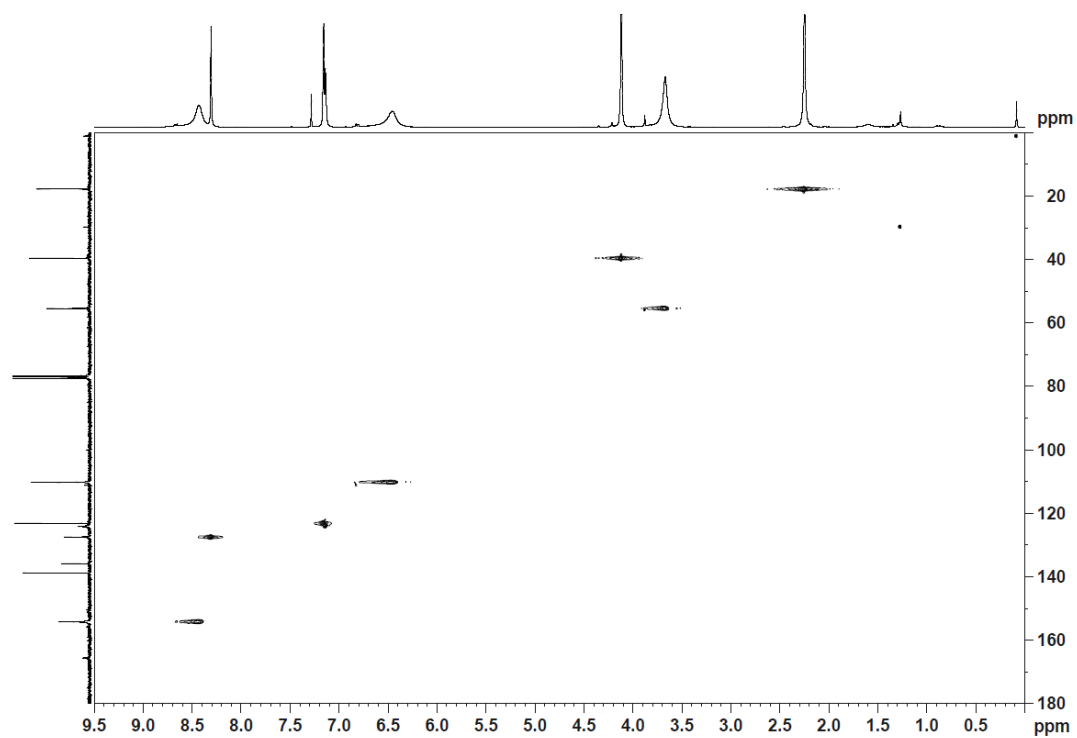

**Figure S11.** HMQC NMR spectrum of [4] in  $\text{CDCl}_3$ .

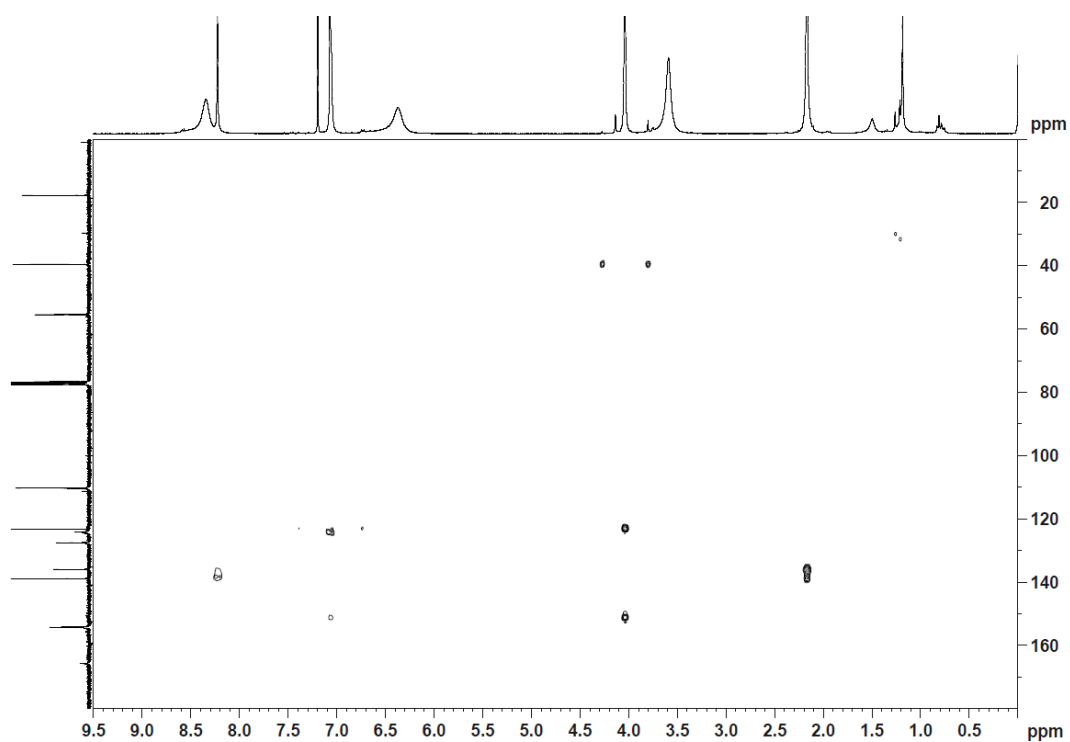

**Figure S12.** HMBC NMR spectrum of [4] in  $\text{CDCl}_3$ .

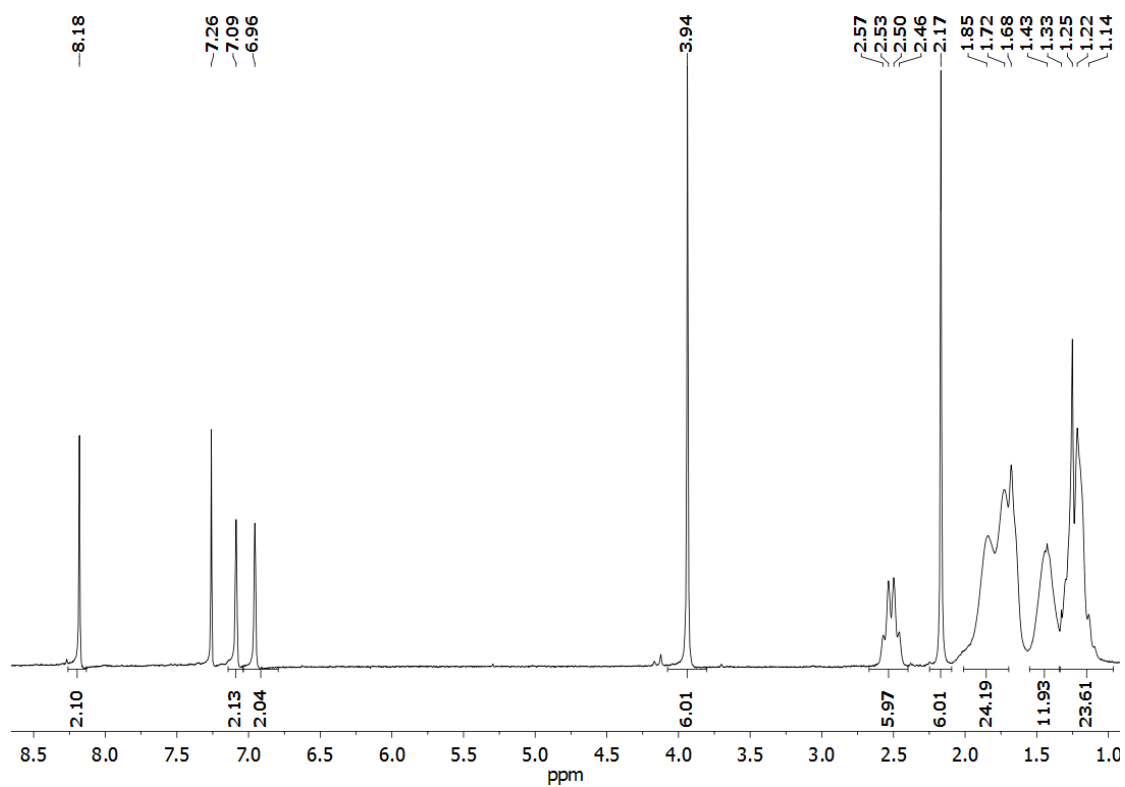



**Figure S13.**  $^1\text{H}$  NMR spectrum of [5] in  $\text{CDCl}_3$ .

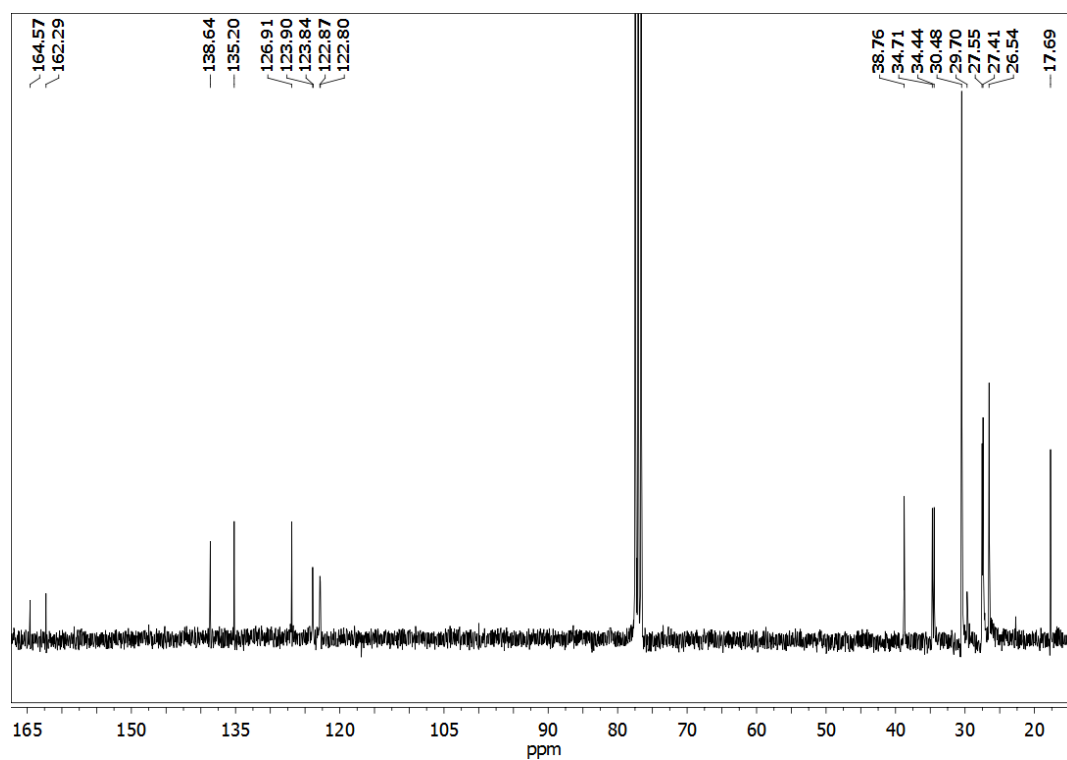

**Figure S14.**  $^{31}\text{P}\{^1\text{H}\}$  NMR spectrum of [5] in  $\text{CDCl}_3$ .

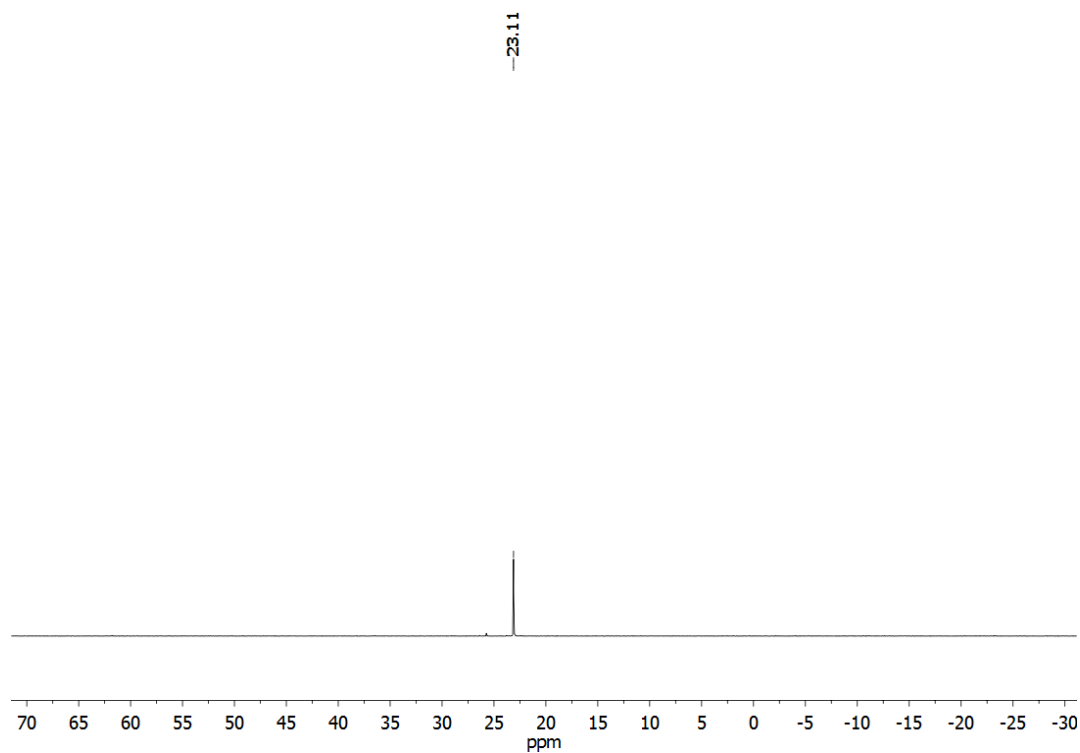

**Figure S15.**  $^{31}\text{P}\{^1\text{H}\}$  NMR spectrum of [5] in  $\text{CDCl}_3$ .

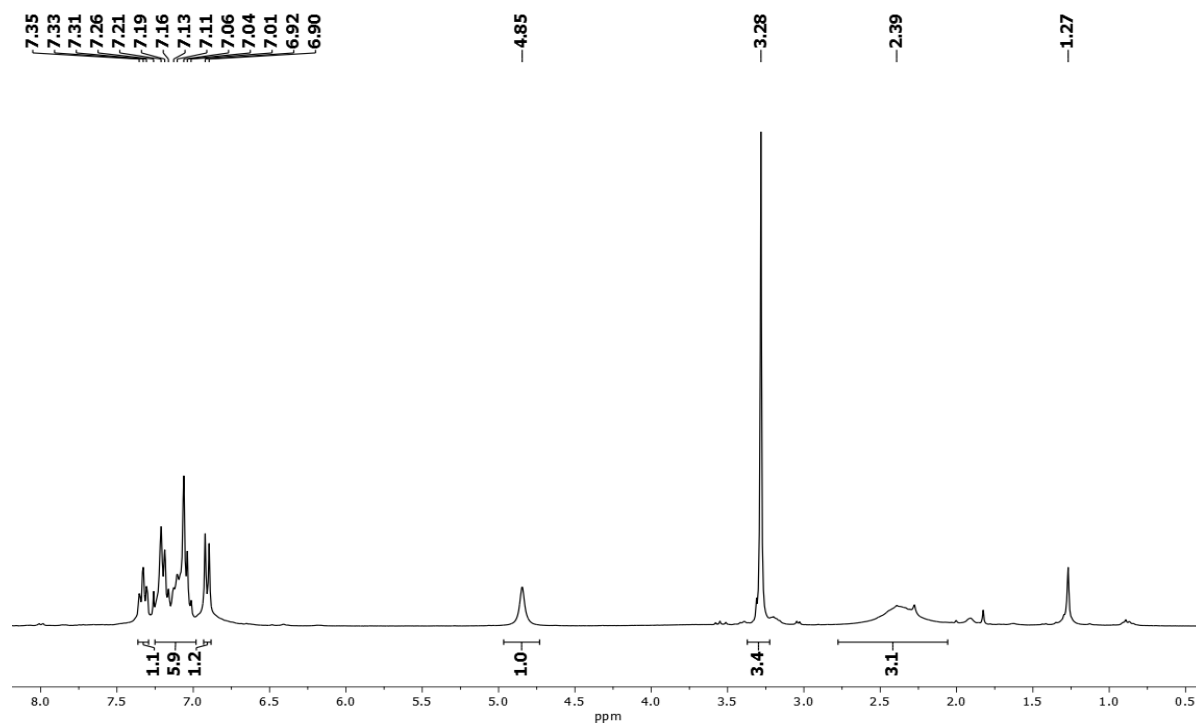

**Figure S16.** <sup>1</sup>H NMR spectrum of 1-methyl-3-(o-tolyl)indolin-2-one in CDCl<sub>3</sub>.

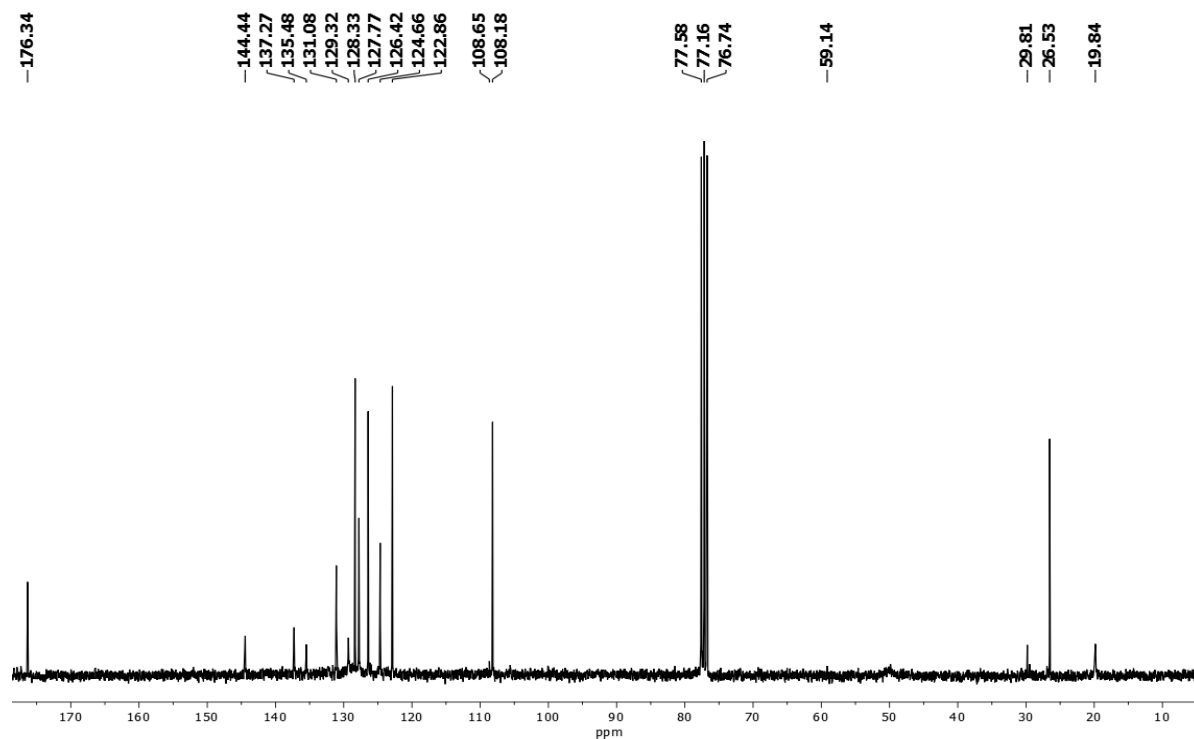

**Figure S17.** <sup>13</sup>C{<sup>1</sup>H} NMR spectrum of 1-methyl-3-(o-tolyl)indolin-2-one in CDCl<sub>3</sub>.

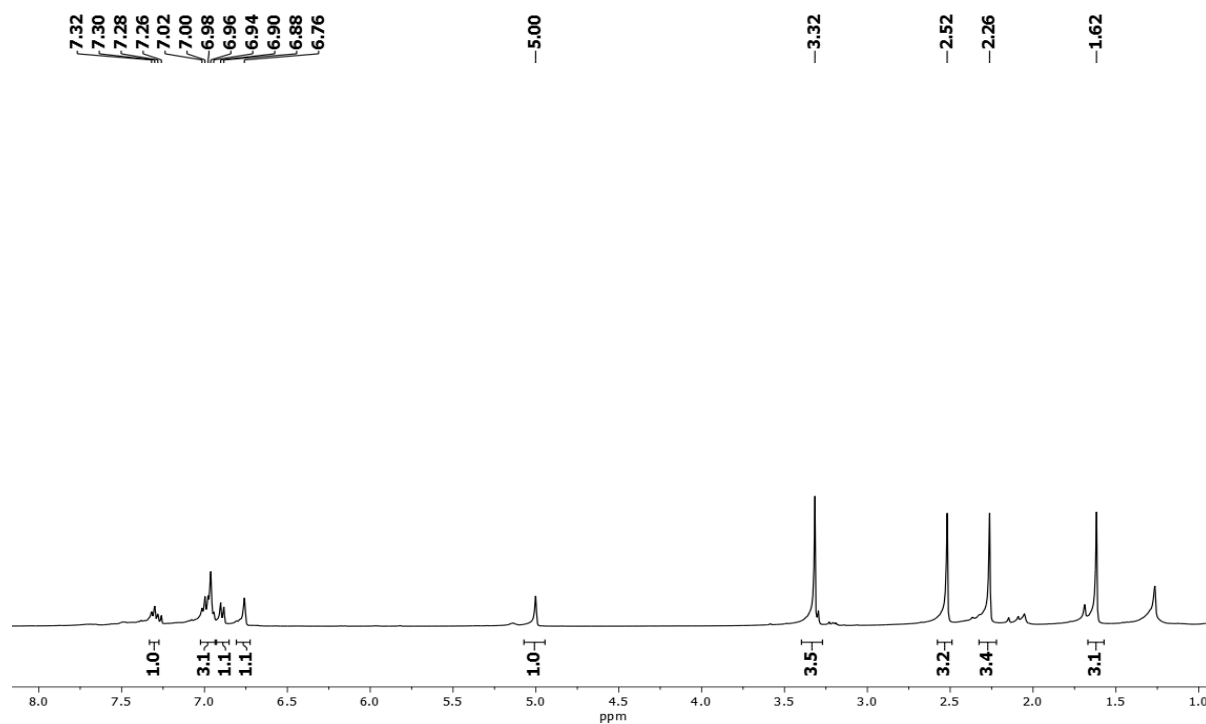

**Figure S18.** <sup>1</sup>H NMR spectrum of 3-mesityl-1-methylindolin-2-one in CDCl<sub>3</sub>.

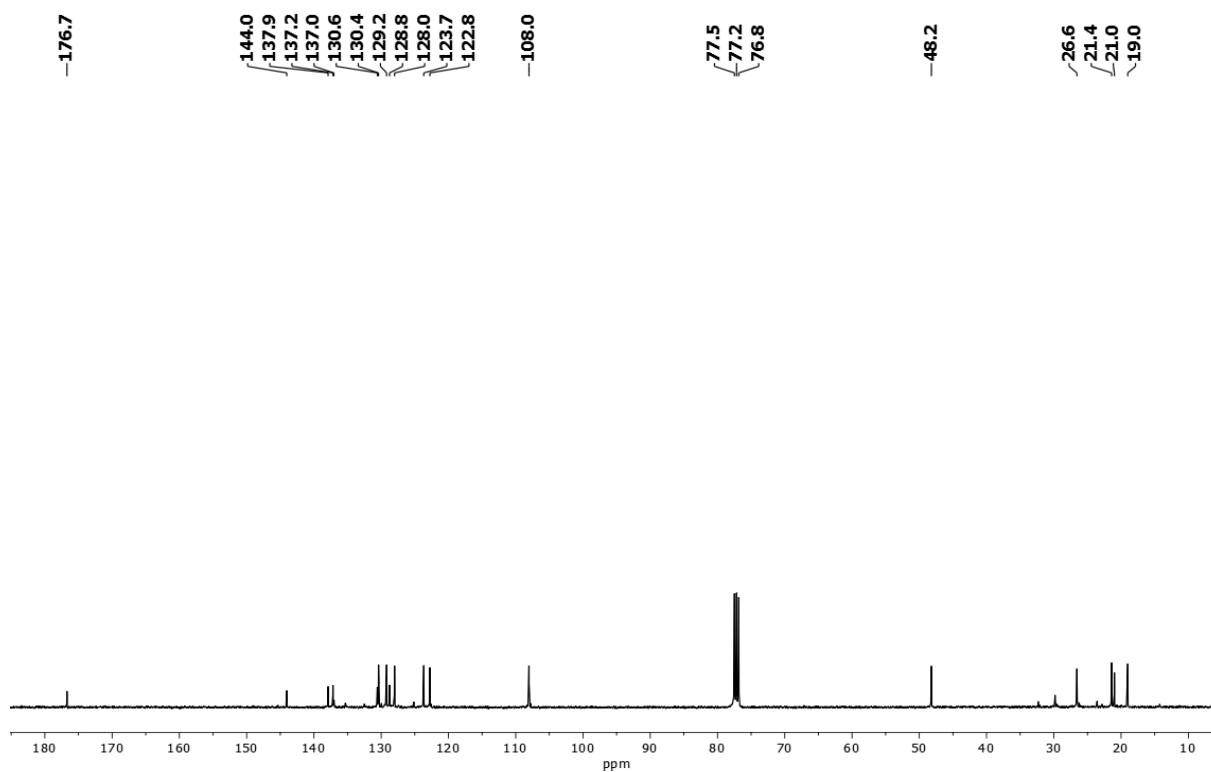

**Figure S19.** <sup>13</sup>C{<sup>1</sup>H} NMR spectrum of 3-mesityl-1-methylindolin-2-one in CDCl<sub>3</sub>.

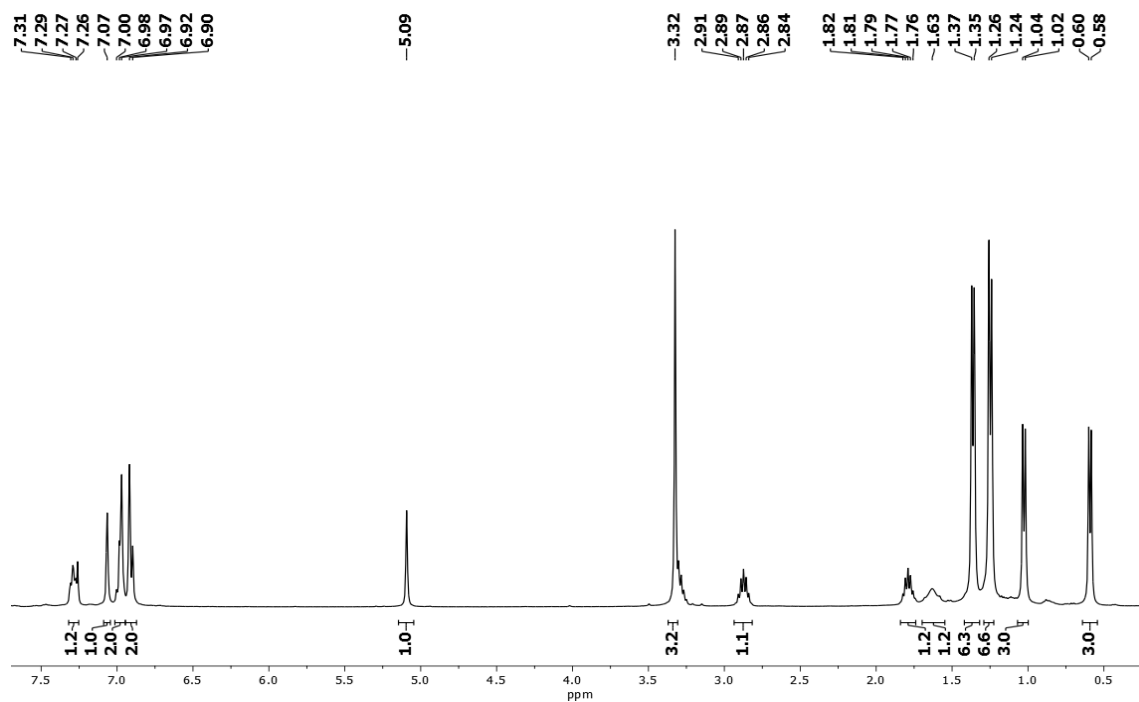

**Figure S20.** <sup>1</sup>H NMR spectrum of 1-methyl-3-(2,4,6-triisopropylphenyl)indolin-2-one in CDCl<sub>3</sub>.

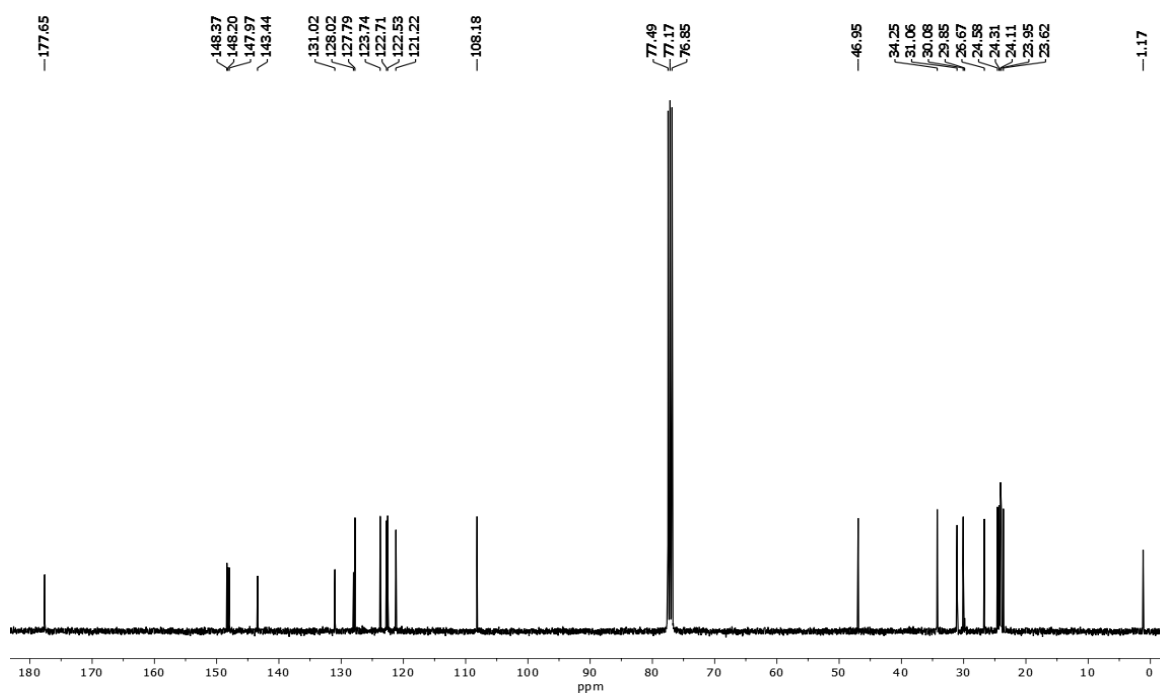

**Figure S21.** <sup>13</sup>C{<sup>1</sup>H} NMR spectrum of 1-methyl-3-(2,4,6-triisopropylphenyl)indolin-2-one in CDCl<sub>3</sub>.

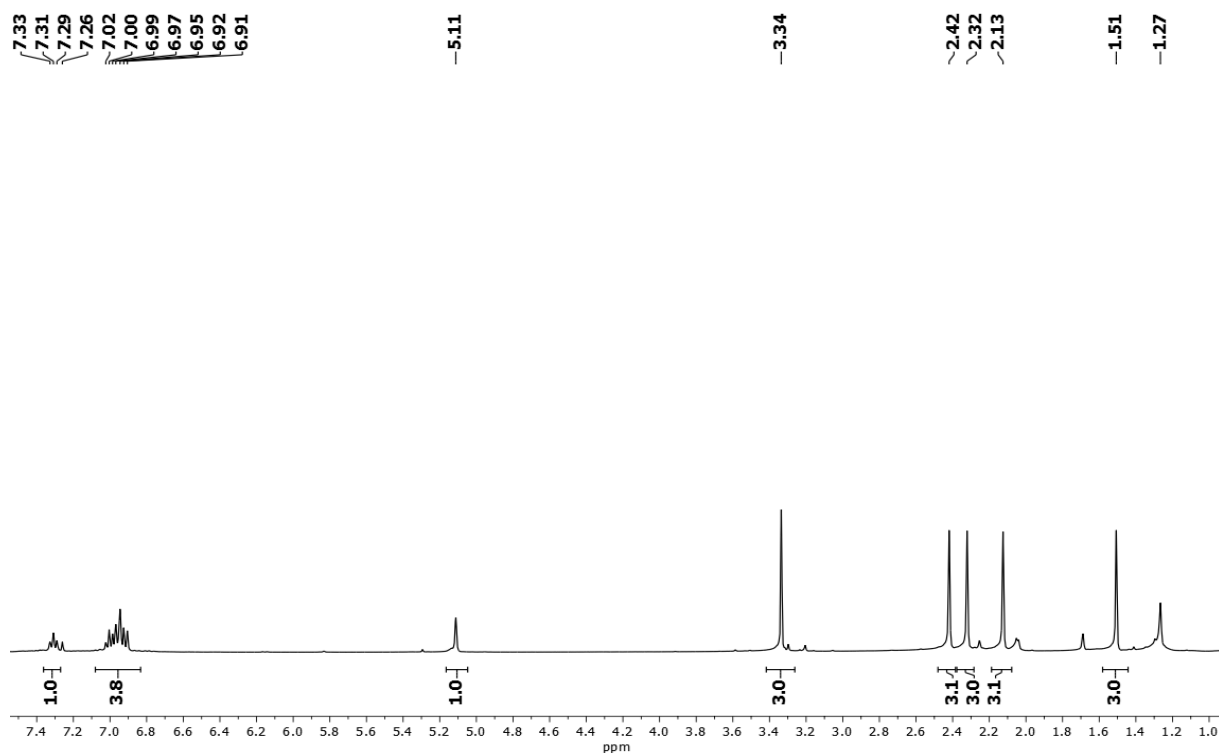

**Figure S22.** <sup>1</sup>H NMR spectrum of 1-methyl-3-(2,3,5,6-tetramethylphenyl)indolin-2-one in CDCl<sub>3</sub>.

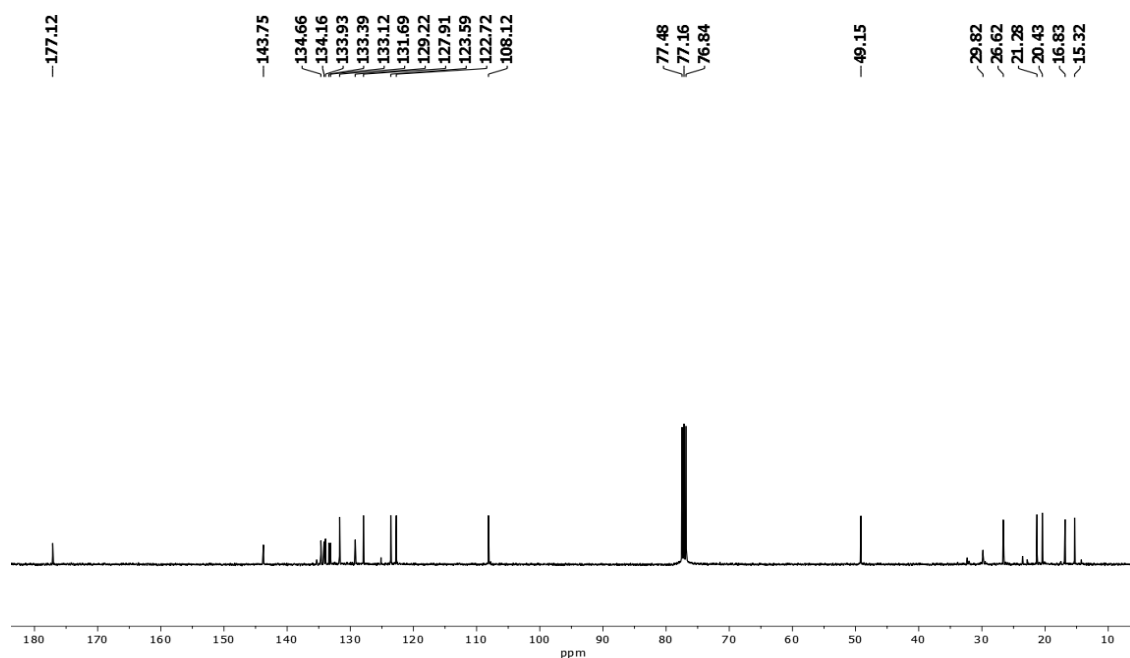

**Figure S23.** <sup>13</sup>C{<sup>1</sup>H} NMR spectrum of 1-methyl-3-(2,3,5,6-tetramethylphenyl)indolin-2-one in CDCl<sub>3</sub>.

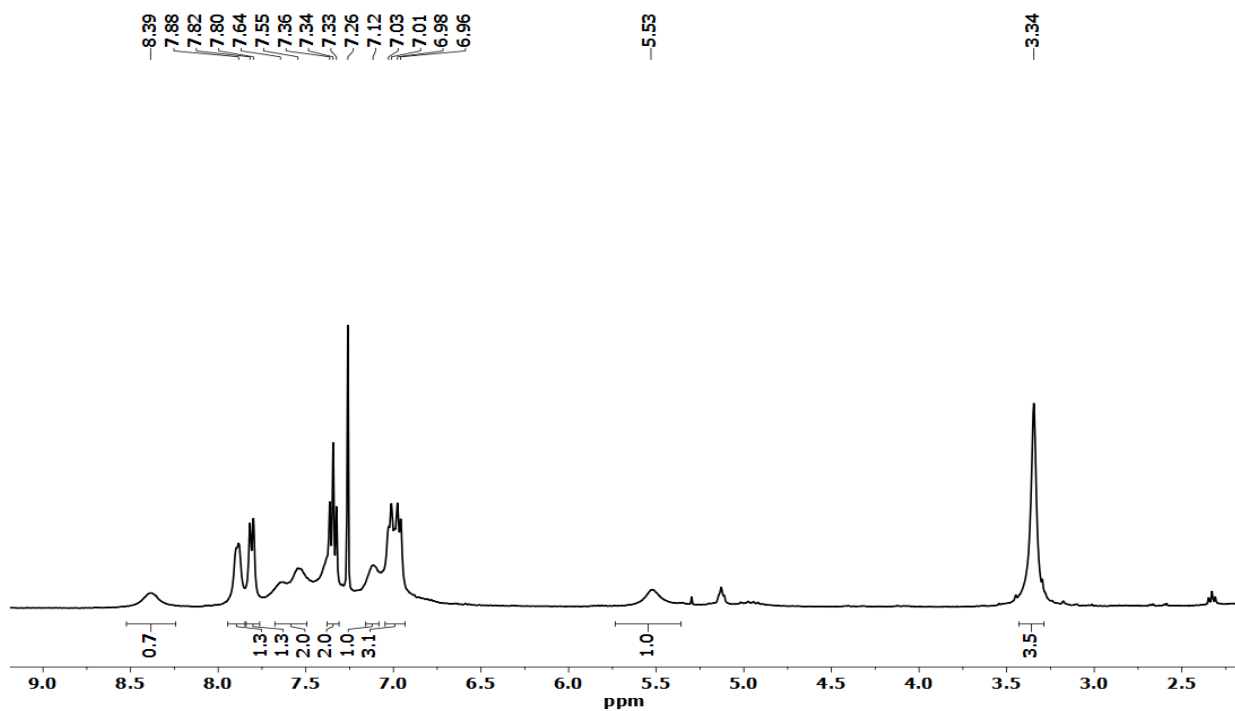

**Figure S24.** <sup>1</sup>H NMR spectrum of 1-methyl-3-(naphthalen-1-yl)indolin-2-one in CDCl<sub>3</sub>.

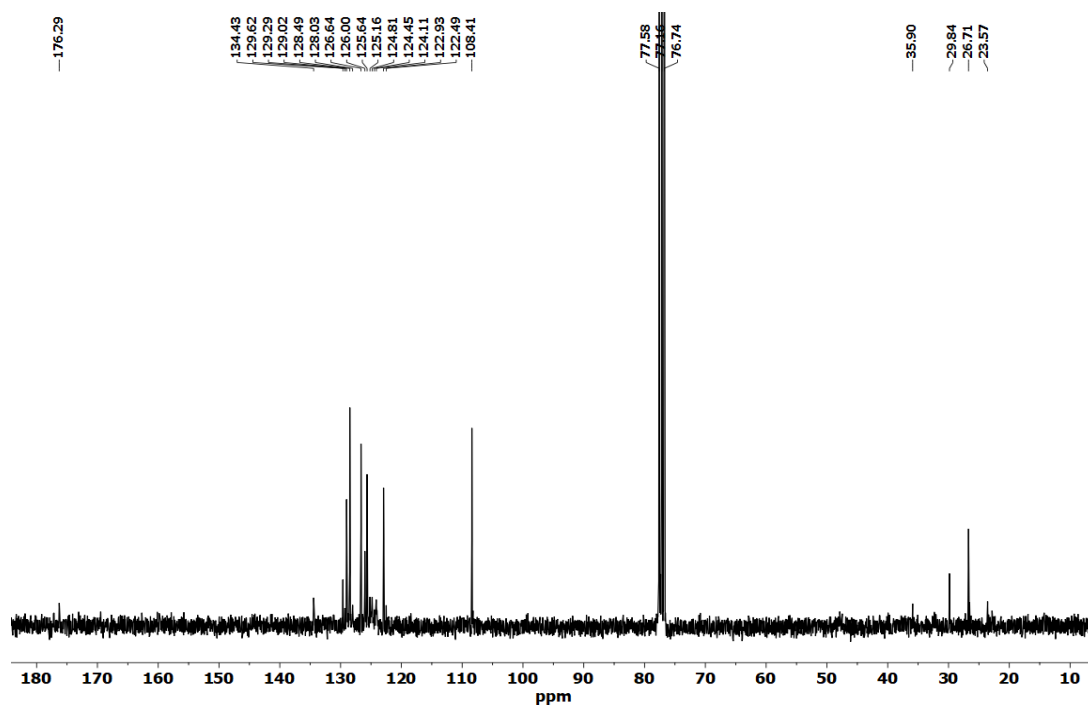

**Figure S25.** <sup>13</sup>C{<sup>1</sup>H} NMR spectrum of 1-methyl-3-(naphthalen-1-yl)indolin-2-one in CDCl<sub>3</sub>.

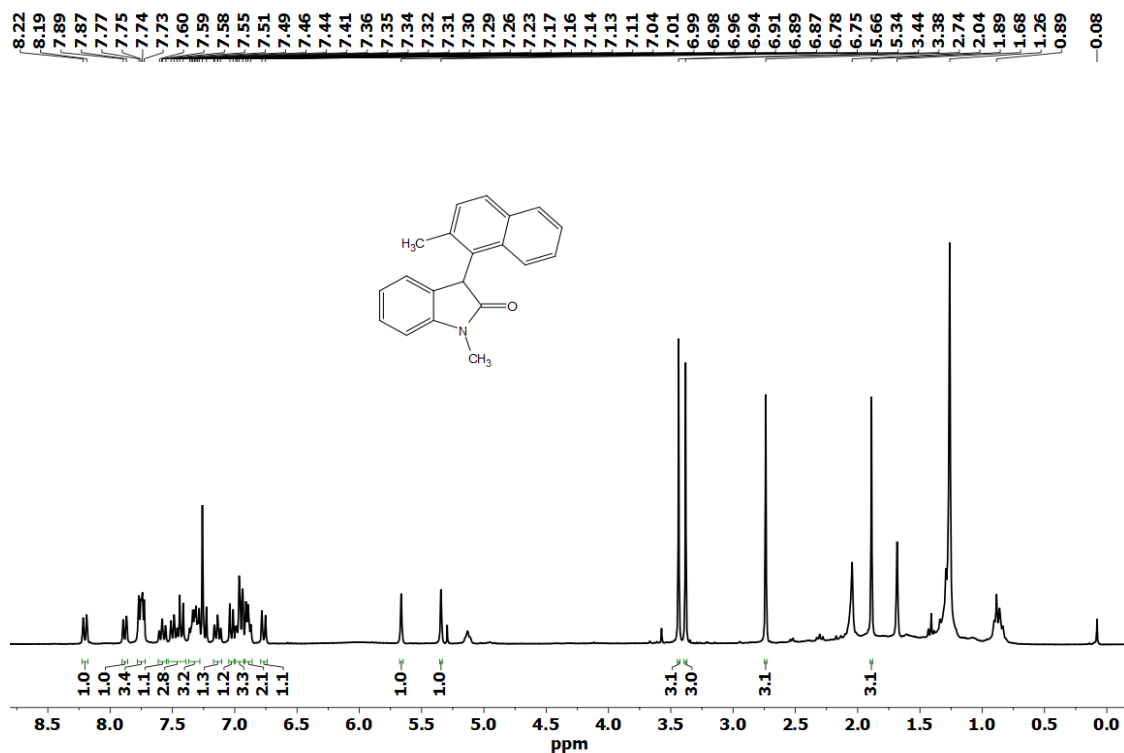

**Figure S26.** <sup>1</sup>H NMR spectrum of 1-methyl-3-(2-methylnaphthalen-1-yl)indolin-2-one in CDCl<sub>3</sub>.

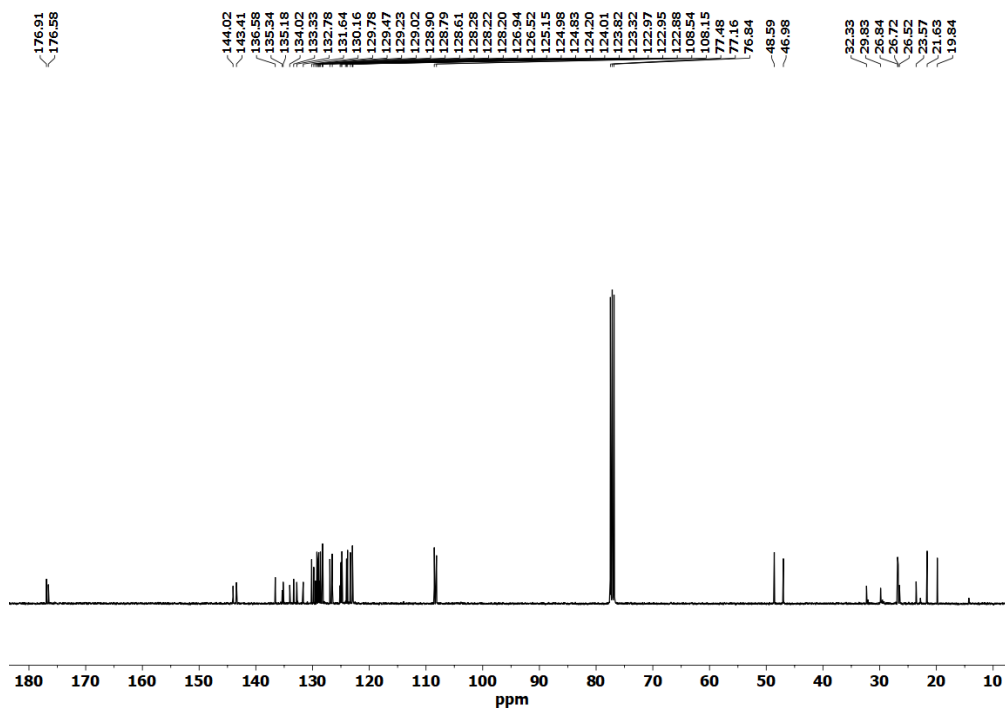

**Figure S27.** <sup>13</sup>C{<sup>1</sup>H} NMR spectrum of 1-methyl-3-(2-methylnaphthalen-1-yl)indolin-2-one in CDCl<sub>3</sub>.

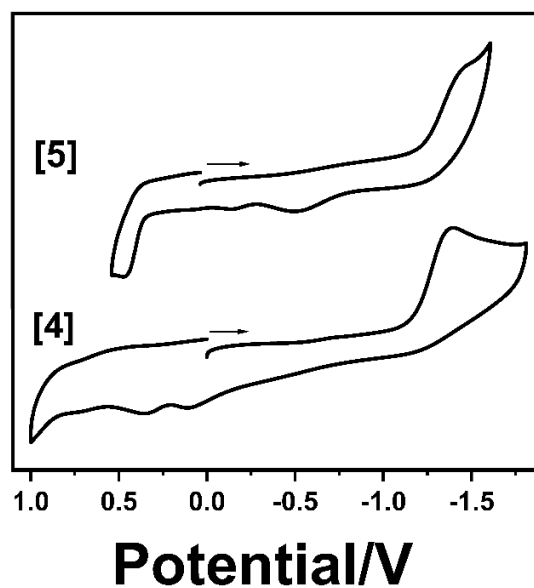

**Figure S28.** Cyclic voltammograms of the complexes [4] and [5] in DMF–0.1 M Bu<sub>4</sub>NClO<sub>4</sub> at 298 K. Scan rate: 100 mV s<sup>–1</sup>.

**Table S1.** Electrochemical data from cyclic voltammetry<sup>[a]</sup>

| complex | $E^{\text{red1}} / \text{V}^{\text{b}}$ | $E^{\text{ox1}} / \text{V}^{\text{b}}$ | $E^{\text{ox2}} / \text{V}^{\text{b}}$ | $E^{\text{ox3}} / \text{V}^{\text{b}}$ |
|---------|-----------------------------------------|----------------------------------------|----------------------------------------|----------------------------------------|
| [4]     | -1.38                                   | 0.09                                   | 0.35                                   | -                                      |
| [5]     | -1.53                                   | -0.51                                  | -0.14                                  | 0.46                                   |

<sup>[a]</sup> Cyclic voltammograms of the complexes in DMF–0.1 M Bu<sub>4</sub>NClO<sub>4</sub> at 298 K. Scan rate: 100 mV s<sup>–1</sup>.



**Table S2.** Solvent screening for catalytic copper-free Sonogashira coupling reaction.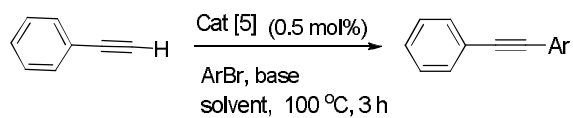

| Entry | ArBr                | Solvent | Base                            | CuI (2 mol%) | yield (%) |
|-------|---------------------|---------|---------------------------------|--------------|-----------|
| 1     | 4-Bromoacetophenone | DMF     | Cs <sub>2</sub> CO <sub>3</sub> | -            | 20        |
| 2     | 4-Bromoacetophenone | DMF     | Cs <sub>2</sub> CO <sub>3</sub> | CuI          | 42        |
| 3     | 4-Bromoacetophenone | DMF     | KOtBu                           | CuI          | 53        |
| 4     | 4-Bromoacetophenone | Toluene | KOtBu                           | -            | 0         |
| 5     | 4-Bromoacetophenone | ACN     | KOtBu                           | -            | 0         |
| 6     | 4-Bromoacetophenone | DMF     | KOtBu                           | -            | 84        |

**Table S3.** Crystallographic details

|                                                                 |                                                                                              |
|-----------------------------------------------------------------|----------------------------------------------------------------------------------------------|
|                                                                 | <b>[4]</b>                                                                                   |
| Chemical formula                                                | C <sub>28</sub> H <sub>32</sub> I <sub>4</sub> N <sub>6</sub> O <sub>2</sub> Pd <sub>2</sub> |
| <i>M<sub>r</sub></i>                                            | 1204.99                                                                                      |
| Crystal system                                                  | Monoclinic                                                                                   |
| Space group                                                     | <i>P2<sub>1</sub>/n</i>                                                                      |
| <i>a</i> (Å)                                                    | 9.3535(8)                                                                                    |
| <i>b</i> (Å)                                                    | 23.046(2)                                                                                    |
| <i>c</i> (Å)                                                    | 17.3965(15)                                                                                  |
| <i>α</i> (°)                                                    | 90                                                                                           |
| <i>β</i> (°)                                                    | 102.035(4)                                                                                   |
| <i>γ</i> (°)                                                    | 90                                                                                           |
| <i>V</i> (Å <sup>3</sup> )                                      | 3667.6(6)                                                                                    |
| <i>Z</i>                                                        | 4                                                                                            |
| Density (g cm <sup>-3</sup> )                                   | 2.182                                                                                        |
| <i>F</i> (000)                                                  | 2248.0                                                                                       |
| Radiation Type                                                  | CuK <sub>α</sub>                                                                             |
| <i>μ</i> (mm <sup>-1</sup> )                                    | 34.615                                                                                       |
| Crystal size                                                    | 0.4 x 0.15 x 0.12                                                                            |
| Meas. Refl.                                                     | 50546                                                                                        |
| Indep. Refl.                                                    | 6032                                                                                         |
| Obsvd. <i>I</i> > 2σ( <i>I</i> ) refl.                          | 6391                                                                                         |
| <i>R</i> <sub>int</sub>                                         | 0.1091                                                                                       |
| <i>R</i> [ <i>F</i> <sup>2</sup> > 2σ( <i>F</i> <sup>2</sup> )] | 0.0678                                                                                       |
| <i>wR</i> ( <i>F</i> <sup>2</sup> )                             | 0.1807                                                                                       |
| <i>S</i>                                                        | 1.293                                                                                        |
| Δρ <sub>max</sub> (e Å <sup>-3</sup> )                          | 1.57                                                                                         |
| Δρ <sub>min</sub> (e Å <sup>-3</sup> )                          | -2.90                                                                                        |

**Table S4.** Selected bond lengths in Å

| Atoms     | [3]        |
|-----------|------------|
| Pd1 – I1  | 2.6225(11) |
| Pd1 – I2  | 2.6025(11) |
| Pd2 – I3  | 2.6046(9)  |
| Pd2 – I4  | 2.5952(10) |
| Pd1 – C1  | 1.950(11)  |
| Pd2 – C14 | 1.968(11)  |
| Pd1–N3    | 2.088(9)   |
| Pd2–N6    | 2.079(9)   |
| N1– C1    | 1.336(14)  |
| N2– C1    | 1.365(14)  |
| N4– C14   | 1.333(14)  |
| N5– C14   | 1.345(13)  |
| C2– C3    | 1.339(18)  |
| C12– C13  | 1.338(16)  |

**Table S5.** Selected bond angles in °

| Atoms      | [3]       |
|------------|-----------|
| I1–Pd1–C1  | 87.2(3)   |
| I2–Pd1–C1  | 87.7(3)   |
| I1–Pd1–I2  | 171.43(4) |
| I3–Pd2–C14 | 89.4(3)   |
| I3–Pd2–I4  | 173.62(4) |
| N3–Pd1–C1  | 177.8(4)  |
| N6–Pd2–C14 | 175.8(4)  |
| N1–C1–N2   | 105.4(9)  |
| N4–C14–N5  | 105.3(9)  |
